# Supplementary material
Source: Royal Society of Chemistry journal article supplement (doi:10.1039/d6tc00934d)
Supplement: d6tc00934d1.pdf [file d6tc00934d1.pdf]

## Supporting Information

### **Synergy of intramolecular hydrogen bonding and $\pi$ -bridge locking enables high-efficiency red/NIR electroluminescence**

Hui Wang<sup>a</sup>, Chuan-Sheng Ping<sup>a</sup>, Chen-Long Lou<sup>a</sup>, Jia Yu<sup>ab</sup>, Xiao-Chun Fan<sup>ab\*</sup>, Kai Wang<sup>ac\*</sup>

<sup>a</sup>. Institute of Functional Nano & Soft Materials (FUNSOM), Soochow University, Suzhou, Jiangsu 215123, P. R. China.

<sup>b</sup>. Jiangsu Key Laboratory of Advanced Negative Carbon Technologies, Soochow University, Suzhou, 215123, Jiangsu, PR China.

<sup>c</sup>. State Key Laboratory of Bioinspired Interfacial Materials Science, Soochow University, Suzhou, 215123, Jiangsu, PR China.

Email: [xcfan@suda.edu.cn](mailto:xcfan@suda.edu.cn),

[wkai@suda.edu.cn](mailto:wkai@suda.edu.cn).

## General information

**Materials.** All commercially available reagents were used as received unless otherwise stated. All reactions were carried out using Schlenk techniques under a nitrogen atmosphere.  $^1\text{H}$  and  $^{13}\text{C}$  NMR spectra were measured on a Bruker 400 MHz spectrometer with tetramethylsilane (TMS) as the internal standard. Mass analyses were recorded by an Autoflex MALDI-TOF mass spectrometer.

**Theoretical calculation.** The optimized structures, distributions of HOMO and LUMO, excited states levels and Natural transition orbitals (NTOs) of the lowest adiabatic excited states were analyzed by B3LYP/6-31g (d) basis set via a multifunctional wavefunction analyzer (Multiwfn 3.7). The reorganization energies consist of the external and internal reorganization energy. The external reorganization energy caused by the polarization of the medium can be negligible. The internal reorganization energy is caused by the geometrical deformation in the Franck–Condon vertical absorption transition and radiative process, and the value can be estimated as the following equation:

$$\lambda = \lambda_{S_0} + \lambda_{S_1} = [E^{S_0}(S_1) - E^{S_0}(S_0)] + [E^{S_1}(S_0) - E^{S_1}(S_1)] \quad (\text{S1})$$

Here,  $E^{S_0}(S_1)$  is the energy of the  $S_0$  state with the optimized  $S_1$  geometry,  $E^{S_0}(S_0)$  is the energy of the  $S_0$  state with the optimized  $S_0$  geometry,  $E^{S_1}(S_0)$  is the energy of  $S_1$  state with the optimized  $S_0$  geometry, and  $E^{S_1}(S_1)$  is the energy of  $S_1$  state with the optimized  $S_1$  geometry. The single point energy was calculated at B3LYP level with 6-31G (d, p) basis set. The decomposition of the reorganization energies was realized by using Gaussian 16 software package. The spin-density distributions (SSDs) of the lowest excited triplet states were analyzed using a multifunctional wavefunction analyzer (Multiwfn 3.7) and visualized with VMD program.

**Electrochemical and thermal measurements.** Cyclic voltammetry was performed on a CHI 660 instrument. Individual samples were dissolved in dichloromethane solution and degassed with nitrogen gas for 15 minutes before the test. 0.1 M tetrabutylammonium perchlorate in  $10^{-3}$  M dichloromethane (DCM) solution served as

the supporting electrolyte with ferrocene/ferrocenium (Fc/Fc<sup>+</sup>) as the internal reference. A saturated silver chloride (AgCl) electrode, Pt disks and gold (Au) electrode were used as a reference electrode, counter electrode and working electrode, respectively. The energy levels of HOMO ( $E_{\text{HOMO}}$ ) and LUMO ( $E_{\text{LUMO}}$ ) of the compounds were determined from onset position of their oxidation and reduction curves in  $10^{-3}$  M DCM solution relative to that of Fc<sup>+</sup>/Fc by using the equations  $E_{\text{HOMO}}$  (eV) =  $-(E_{\text{ox}} - E_{1/2, \text{Fc}} + 5.1)$  eV and  $E_{\text{LUMO}}$  (eV) =  $-(E_{\text{re}} - E_{1/2, \text{Fc}} + 5.1)$  eV. Thermogravimetric analysis (TGA) was performed on a TA SDT 2960 instrument at a heating rate of  $10\text{ }^{\circ}\text{C min}^{-1}$  under nitrogen. Temperature at 5% weight loss was used as the decomposition temperature ( $T_{\text{d}}$ ).

**Photophysical measurements.** UV–Vis absorption spectra were recorded on a Hitachi U-3900 spectrophotometer. PL spectra were recorded on a Hitachi F-4600 fluorescence spectrophotometer with default collection intervals. Transient fluorescence decays were measured with a Quantaaurus-Tau fluorescence lifetime spectrometer (C11367-32, Hamamatsu Photonics) with an excitation wavelength of 373 nm and pulse width of 100 ps. The absolute PL quantum yields were recorded on a Hamamatsu Quantaaurus-QY quantum yield spectrometer (C13534-11).

**Single-Crystal Structure.** Diffraction data were collected on a Rigaku R-AXIS-RAPID diffractometer using  $\omega$ -scan mode with graphite-monochromator MoK $\alpha$  radiation. The structure determination was solved with direct methods using the SHELXTL programs and refined with full-matrix least squares on  $F^2$ . All crystallographic information in CIF format has been deposited at the Cambridge Crystallographic Center (CCDC) under deposition number 2175310 for QCN-AC via [www.ccdc.cam.ac.uk/data\\_request/cif](http://www.ccdc.cam.ac.uk/data_request/cif).

**Device fabrication and measurement of EL characteristics.** All the emitters were applied in the OLEDs after sublimation. OLEDs were fabricated on the indium-tin oxide (ITO) coated transparent glass substrates. Before device fabrication, the substrates were cleaned with ethanol, acetone and deionized water, and then dried in an oven, finally exposed to UV ozone for 15 min. All the organic materials and metal layers were thermal evaporated under a pressure of  $4 \times 10^{-4}$  Pa. EL spectra, luminance,

efficiency and current density–voltage–luminance characteristics were measured with a constant-source Keithley 2400 source meter and an integrating sphere (Hamamatsu C9920-02).

## Experimental

### Synthesis

2-(4-Bromophenyl)quinoxaline-6,7-dicarbonitrile (**QCN-Br**) and **QCN-TPA** were synthesized according to a previous report.<sup>1</sup> The intermediate product 9,9-dimethyl-10-phenyl-2-(4,4,5,5-tetramethyl-1,3,2-dioxaborolan-2-yl)-9,10-dihydroacridine (**AC-Bpin**) was also obtained according to the reported literature.<sup>2</sup>

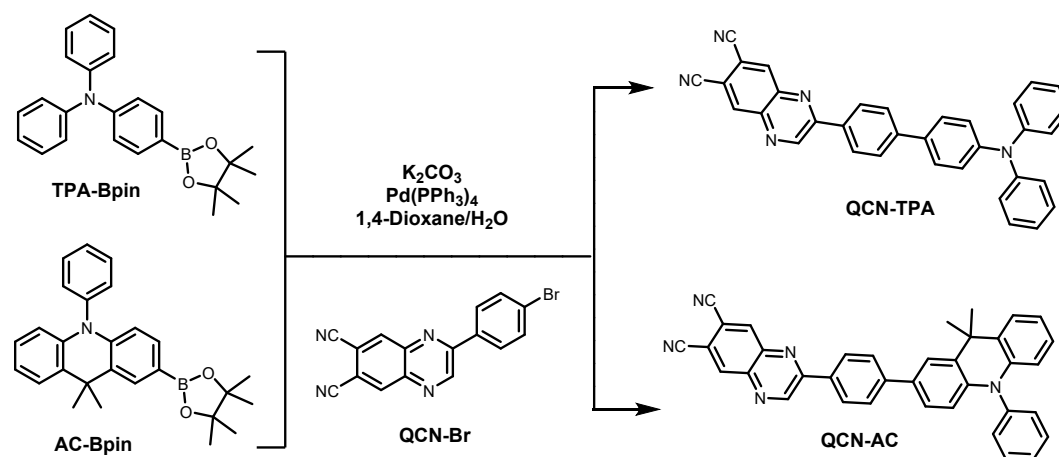

**Scheme S1.** Experimental procedure of **QCN-TPA** and **QCN-AC**.

### 2-(4-(9,9-Dimethyl-10-phenyl-9,10-dihydroacridin-2-yl)phenyl)quinoxaline-6,7-dicarbonitrile (**QCN-AC**)

**QCN-Br** (1.00 g, 3 mmol), **AC-Bpin** (1.35 g, 3.3 mmol),  $K_2CO_3$  (0.85 g, 6 mmol),  $Pd(PPh_3)_4$  (174 mg, 0.15 mmol) and 80 mL of 1,4-dioxane/ $H_2O$  (1:1) were added to a three-necked flask (100 mL) under a nitrogen atmosphere. Then, the mixture was stirred at 100 °C for 24 h. After the reaction was completed, dichloromethane and water were added, and the organic layer was separated and concentrated in vacuo. The solid residue

was purified by column chromatography with dichloromethane to obtain the product (1.00 g, 62%).  $^1\text{H NMR}$  (400 MHz,  $\text{CDCl}_3$ ,  $\delta$ ):  $\delta$  9.57 (s, 1H), 8.60 (d,  $J = 11.8$  Hz, 2H), 8.33 (d,  $J = 8.5$  Hz, 2H), 7.83–7.79 (m, 3H), 7.67 (t,  $J = 7.7$  Hz, 2H), 7.56 (t,  $J = 7.5$  Hz, 1H), 7.50 (dd,  $J = 7.4, 1.9$  Hz, 1H), 7.39–7.36 (m, 2H), 7.32 (dd,  $J = 8.6, 2.2$  Hz, 1H), 6.99 (td,  $J = 7.0, 1.7$  Hz, 2H), 6.39 (d,  $J = 8.6$  Hz, 1H), 6.32–6.29 (m, 1H), 1.79 (s, 6H).  $m/z$ :  $[\text{M}]^+$  Calcd for  $\text{C}_{37}\text{H}_{25}\text{N}_5$ , 539.31; found, 539.35.

### Theoretical calculations

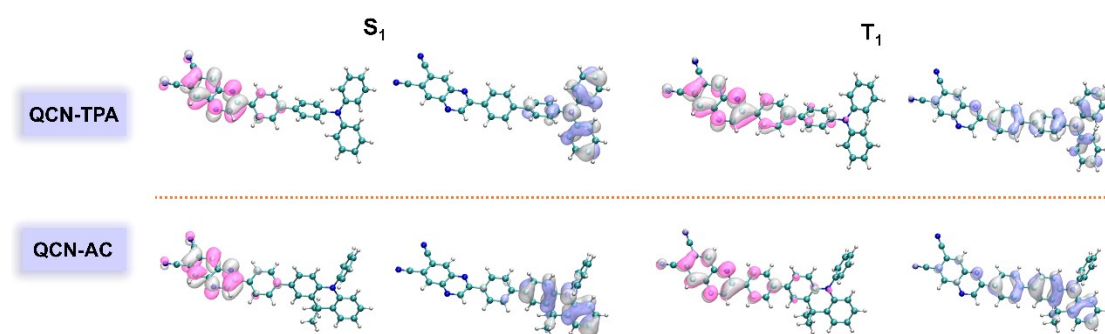

**Fig. S1** Natural transition orbital (NTO) analysis of QCN-TPA and QCN-AC.

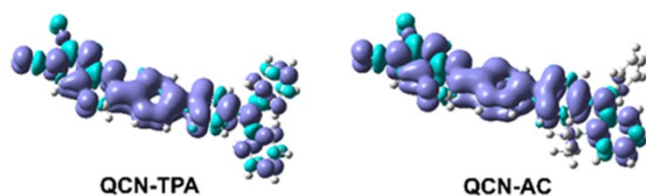

**Fig. S2** Triplet spin density distribution (SDD) analysis of QCN-TPA and QCN-AC.

**Table S1.** Summary of the theoretical calculated results of QCN-TPA and QCN-AC.

| Molecule | HOMO<br>(eV) | LUMO<br>(eV) | $E_g$<br>(eV) | $S_1$<br>(eV) | $T_1$<br>(eV) | $\Delta E_{ST}$<br>(eV) | $f$  |
|----------|--------------|--------------|---------------|---------------|---------------|-------------------------|------|
| QCN-TPA  | -5.24        | -2.94        | 2.39          | 2.04          | 1.86          | 0.18                    | 0.27 |
| QCN-AC   | -5.16        | -2.89        | 2.26          | 2.02          | 1.82          | 0.20                    | 0.29 |

### Electrochemical properties

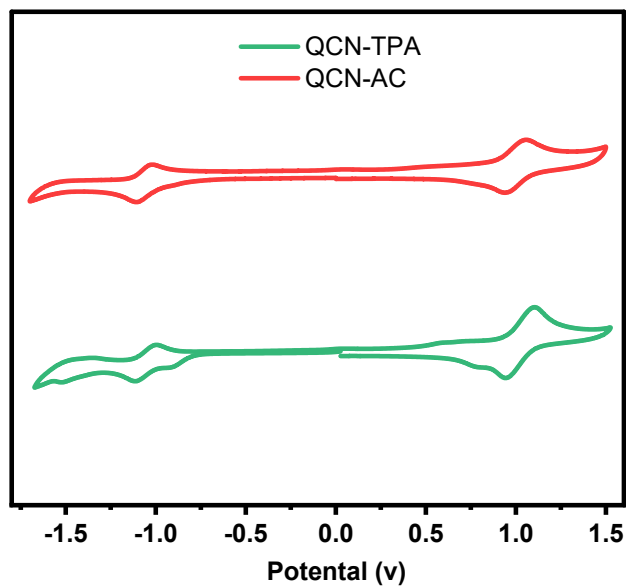

**Fig. S3** Cyclic voltammogram curves of QCN-TPA and QCN-AC.

### Thermal properties

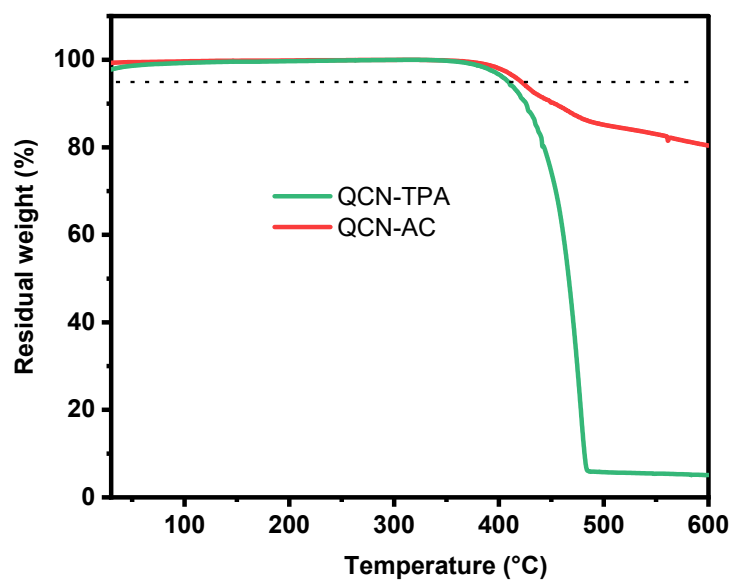

**Fig. S4** TGA curves of QCN-TPA and QCN-AC.

### Transient PL measurements

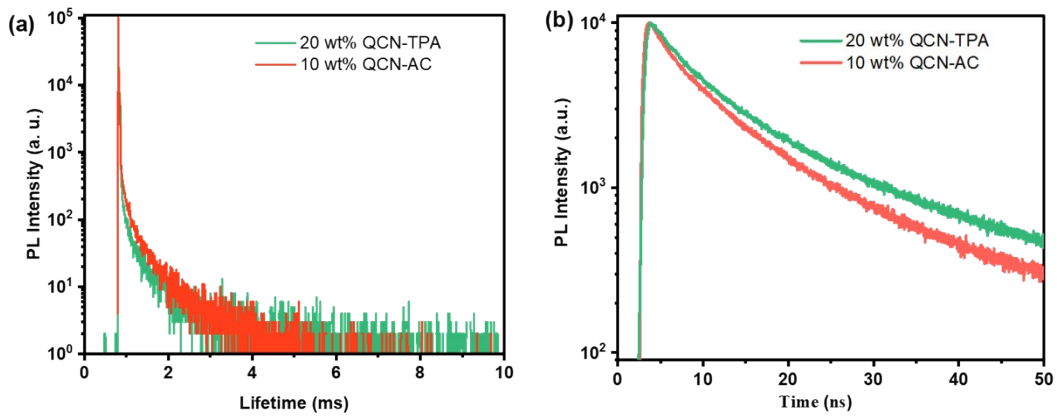

**Fig. S5** Transient PL decay curves of 20 wt% QCN-TPA, 10 wt% QCN-AC doped in CBP films in the time range of (a) 10 ms and (b) 50 ns at 300 K under vacuum conditions.

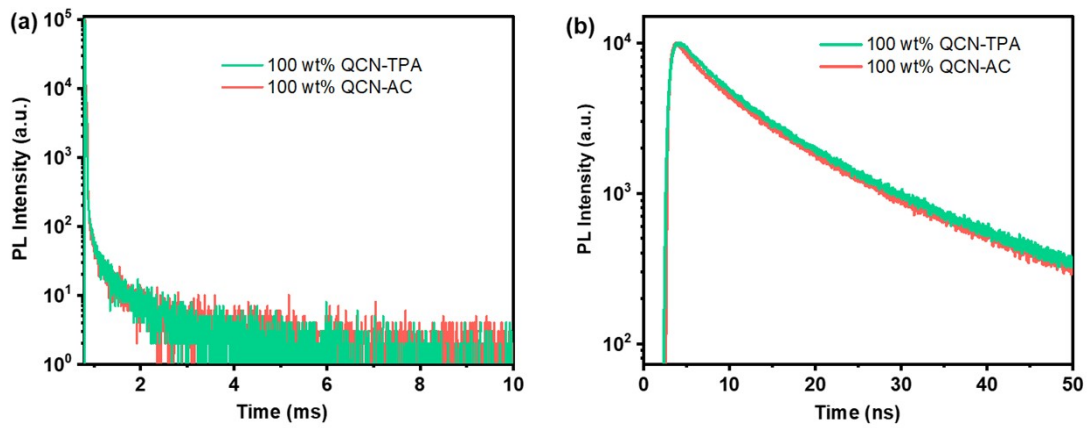

**Fig. S6** Transient PL decay curves of neat films based on QCN-TPA and QCN-AC measured at 300 K under vacuum, with time scales of (a) 10 ms and (b) 50 ns.

**Table S2.** Kinetic parameters of QCN-TPA and QCN-AC.

|         | wt  | $\phi_{PL}$ | $\phi_p/\phi_d$ | $\tau_p$ | $\tau_d$   | $k_r^s$              | $k_p$                | $k_d$                | $k_{ISC}$            | $k_{RISC}$           | $k_{IC}$             |
|---------|-----|-------------|-----------------|----------|------------|----------------------|----------------------|----------------------|----------------------|----------------------|----------------------|
| EMLs    | [%] | [%]         | [%]             | [ns]     | [ $\mu$ s] | [ $10^7$ s $^{-1}$ ] | [ $10^7$ s $^{-1}$ ] | [ $10^5$ s $^{-1}$ ] | [ $10^7$ s $^{-1}$ ] | [ $10^5$ s $^{-1}$ ] | [ $10^7$ s $^{-1}$ ] |
| QCN-TPA | 20  | 80          | 27/53           | 13.4     | 347        | 2.0                  | 7.4                  | 2.9                  | 5.4                  | 7.6                  | 0.5                  |
|         | 100 | 20          | 12/8            | 15.8     | 471        | 0.7                  | 6.3                  | 2.1                  | 5.6                  | 1.8                  | 2.8                  |
| QCN-AC  | 10  | 98          | 50/48           | 10.7     | 404        | 4.6                  | 9.3                  | 2.5                  | 4.7                  | 4.8                  | 0.09                 |
|         | 100 | 25          | 8/17            | 11.8     | 574        | 0.7                  | 8.5                  | 1.7                  | 7.8                  | 3.9                  | 2.1                  |

**Table S3.** Crystal data and structure refinement for QCN-AC.

|                                        |                                                |
|----------------------------------------|------------------------------------------------|
| Identification code                    | QCN-AC                                         |
| Empirical formula                      | C <sub>37</sub> H <sub>25</sub> N <sub>5</sub> |
| Formula weight                         | 539.62                                         |
| Temperature/K                          | 170                                            |
| Crystal system                         | triclinic                                      |
| Space group                            | P-1                                            |
| a/Å                                    | 7.5549(9)                                      |
| b/Å                                    | 11.1032(12)                                    |
| c/Å                                    | 17.0569(18)                                    |
| $\alpha$ /°                            | 88.391(4)                                      |
| $\beta$ /°                             | 89.786(4)                                      |
| $\gamma$ /°                            | 77.616(4)                                      |
| Volume/Å <sup>3</sup>                  | 1396.9(3)                                      |
| Z                                      | 2                                              |
| $\rho_{\text{calc}}/\text{cm}^3$       | 1.283                                          |
| $\mu/\text{mm}^{-1}$                   | 0.077                                          |
| F(000)                                 | 564.0                                          |
| Crystal size/mm <sup>3</sup>           | 0.15 × 0.08 × 0.05                             |
| Radiation                              | MoK $\alpha$ ( $\lambda$ = 0.71073)            |
| 2 $\theta$ range for data collection/° | 3.758 to 52.9                                  |

|                                                |                                                               |
|------------------------------------------------|---------------------------------------------------------------|
| Index ranges                                   | $-9 \leq h \leq 9, -13 \leq k \leq 13, -21 \leq l \leq 21$    |
| Reflections collected                          | 15829                                                         |
| Independent reflections                        | 5682 [ $R_{\text{int}} = 0.0869, R_{\text{sigma}} = 0.1160$ ] |
| Data/restraints/parameters                     | 5682/0/381                                                    |
| Goodness-of-fit on $F^2$                       | 1.011                                                         |
| Final R indexes [ $I >= 2\sigma(I)$ ]          | $R_1 = 0.0764, wR_2 = 0.1684$                                 |
| Final R indexes [all data]                     | $R_1 = 0.1817, wR_2 = 0.2285$                                 |
| Largest diff. peak/hole / $e \text{ \AA}^{-3}$ | 0.29/-0.25                                                    |

## Electroluminescence properties

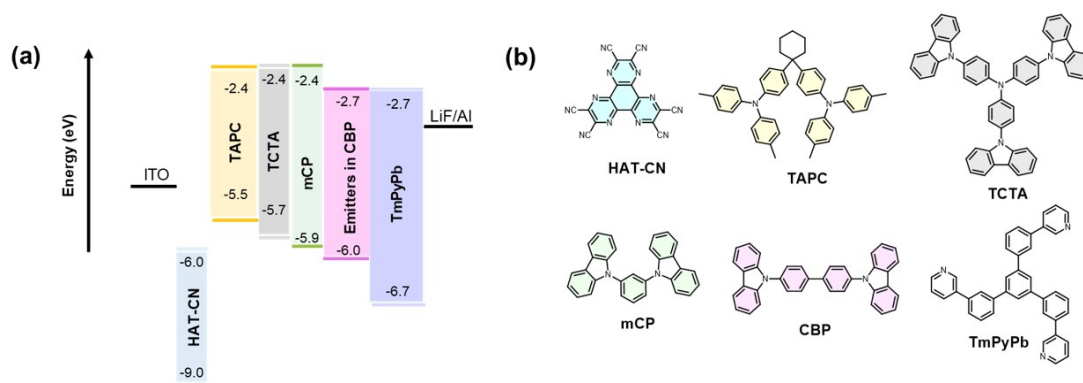

**Fig. S7** (a) Device structure and (b) materials used in the OLED devices.

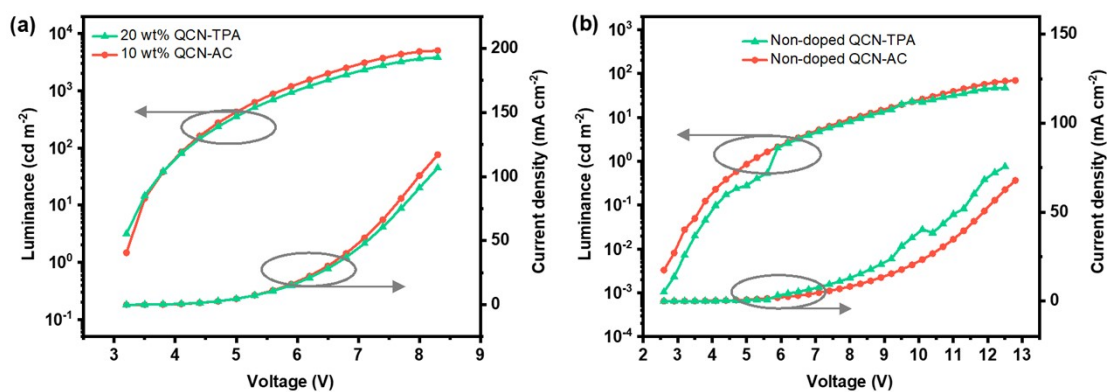

**Fig. S8** J–V–L curves of QCN-TPA and QCN-AC for (a) doped devices and (b) nondoped devices.

**Table S4.** EL performances of the OLED devices based on QCN-TPA and QCN-AC at various doping ratios.

| Emitters | wt (%) | Peak (nm) | CE <sub>max</sub> (cd A <sup>-1</sup> ) | PE <sub>max</sub> (lm W <sup>-1</sup> ) | EQE <sub>max</sub> (%) | CIE (x, y)   |
|----------|--------|-----------|-----------------------------------------|-----------------------------------------|------------------------|--------------|
| QCN-TPA  | 5      | 592       | 30.8                                    | 25.4                                    | 13.6                   | (0.54, 0.45) |
|          | 10     | 612       | 22.8                                    | 22.3                                    | 14.4                   | (0.59, 0.40) |
|          | 15     | 616       | 21.0                                    | 17.8                                    | 14.9                   | (0.60, 0.40) |
|          | 20     | 620       | 24.6                                    | 24.1                                    | 16.8                   | (0.60, 0.39) |
|          | 30     | 644       | 11.0                                    | 10.7                                    | 13.5                   | (0.64, 0.35) |
|          | 100    | 748       | 0.06                                    | 0.12                                    | 1.85                   | (0.70, 0.30) |
| QCN-AC   | 5      | 604       | 47.8                                    | 51.8                                    | 23.6                   | (0.57, 0.43) |
|          | 10     | 620       | 43.8                                    | 43.0                                    | 29.6                   | (0.60, 0.40) |
|          | 15     | 632       | 27.6                                    | 22.2                                    | 22.9                   | (0.63, 0.36) |
|          | 20     | 640       | 15.7                                    | 15.4                                    | 16.8                   | (0.64, 0.35) |
|          | 30     | 652       | 7.6                                     | 7.4                                     | 12.6                   | (0.66, 0.33) |
|          | 100    | 744       | 0.11                                    | 0.14                                    | 3.18                   | (0.70, 0.30) |

## NMR Spectra

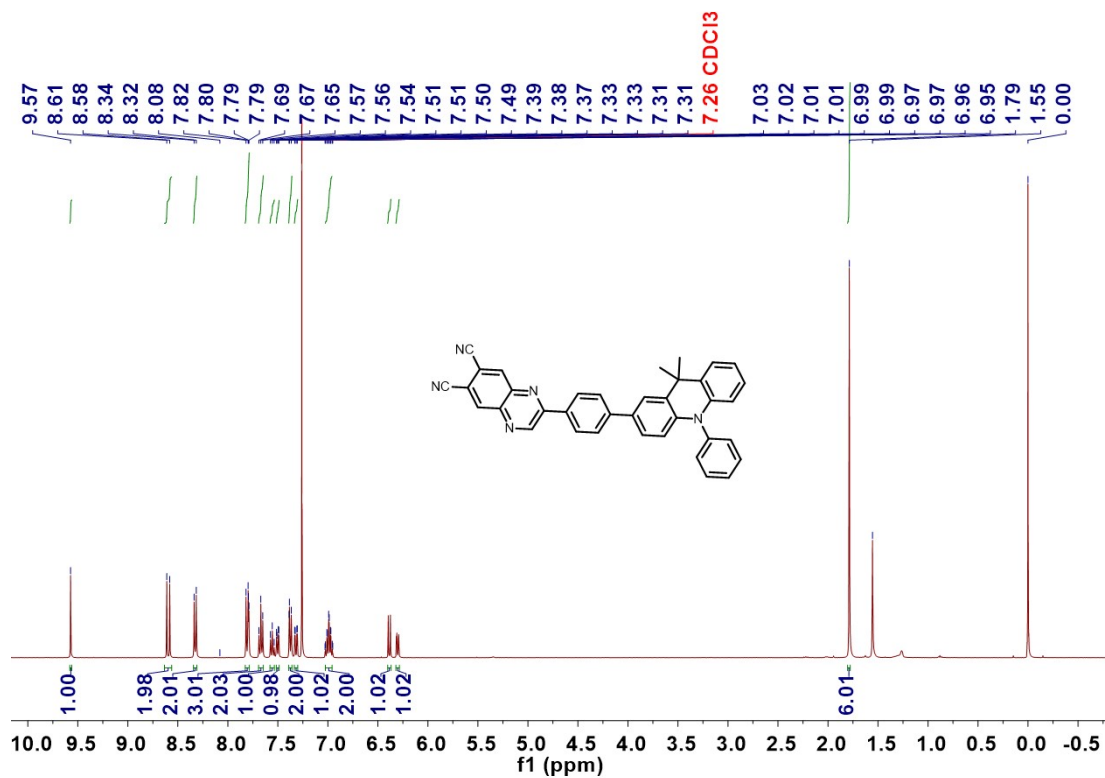

**Fig. S9**  $^1\text{H}$  NMR spectrum ( $\text{CDCl}_3$ , 400 MHz) of QCN-AC.

## References

- [1] C. Li, R. Duan, B. Liang, G. Han, S. Wang, K. Ye, Y. Liu, Y. Yi, Y. Wang, *Angewandte Chemie International Edition*, 2017, **56**, 11525-11529.
- [2] Y.-K. Wang, C.-C. Huang, S. Kumar, S.-H. Li, Z.-L. Dong, M.-K. Fung, Z.-Q. Jiang, L.-S. Liao, *Journal of Materials Chemistry C*, 2018, **6**, 10030-10035.
